# Supplementary material for: A Two-Staged Model of Na+ Exclusion in Rice Explained by 3D Modeling of HKT Transporters and Alternative Splicing
Source: PubMed Central journal article supplement (PMC3394774; doi:10.1371/journal.pone.0039865), 2012-07-11
Supplement: pone.0039865.s004.pdf [file pone.0039865.s004.pdf]

|                |        |       |                                                  |      |
|----------------|--------|-------|--------------------------------------------------|------|
|                |        | 1401  |                                                  | 1450 |
| FL478          | (1)    | ----- | ATGCCGGCGCGCGGTGCTGGATGCTGGCGGCACGGTGGCGG        |      |
| IR29           | (1)    | ----- | ATGCCGGCGCGCGGTGCTGGATGCTGGCGGCACGGTGGCGG        |      |
| Ka             | (1)    | ----- | ATGCCGGCGCGCGGTGCTGGATGCTGGCGGCACGGTGGCGG        |      |
| KV             | (1)    | ----- | ATGCCGGCGCGCGGTGCTGGATGCTGGCGGCACGGTGGCGG        |      |
| NB             | (1)    | ----- | ATGCCGGCGCGCGGTGCTGGATGCTGGCGGCACGGTGGCGG        |      |
| Ni             | (1)    | ----- | ATGCCGGCGCGCGGTGCTGGATGCTGGCGGCACGGTGGCGG        |      |
| NSI            | (1)    | ----- | ATGCCGGCGCGCGGTGCTGGATGCTGGCGGCACGGTGGCGG        |      |
| Po             | (1)    | ----- | ATGCCGGCGCGCGGTGCTGGATGCTGGCGGCACGGTGGCGG        |      |
| SAL            | (1)    | ----- | ATGCCGGCGCGCGGTGCTGGATGCTGGCGGCACGGTGGCGG        |      |
| Ni-HKT1;4 Ex1  | (846)  |       | GCACCTGATGCCGGCGCGCGGTGCTGGATGCTGGCGGCACGGTGGCGG |      |
| Ni-HKT1;4 gDNA | (1401) |       | GCACCTGATGCCGGCGCGCGGTGCTGGATGCTGGCGGCACGGTGGCGG |      |

|                |        |      |                                                    |      |
|----------------|--------|------|----------------------------------------------------|------|
|                |        | 1451 |                                                    | 1500 |
| FL478          | (42)   |      | CGTTCGTCGCCGTGCTGATGGCGCTGGTGTGCGGCATGGAGTGGGGCGGG |      |
| IR29           | (42)   |      | CGTTCGTCGCCGTGCTGATGGCGCTGGTGTGCGGCATGGAGTGGGGCGGG |      |
| Ka             | (42)   |      | CGTTCGTCGCCGTGCTGATGGCGCTGGTGTGCGGCATGGAGTGGGGCGGG |      |
| KV             | (42)   |      | CGTTCGTCGCCGTGCTGATGGCGCTGGTGTGCGGCATGGAGTGGGGCGGG |      |
| NB             | (42)   |      | CGTTCGTCGCCGTGCTGATGGCGCTGGTGTGCGGCATGGAGTGGGGCGGG |      |
| Ni             | (42)   |      | CGTTCGTCGCCGTGCTGATGGCGCTGGTGTGCGGCATGGAGTGGGGCGGG |      |
| NSI            | (44)   |      | CGTTCGTCGCCGTGCTGATGGCGCTGGTGTGCGGCATGGAGTGGGGCGGG |      |
| Po             | (44)   |      | CGTTCGTCGCCGTGCTGATGGCGCTGGTGTGCGGCATGGAGTGGGGCGGG |      |
| SAL            | (44)   |      | CGTTCGTCGCCGTGCTGATGGCGCTGGTGTGCGGCATGGAGTGGGGCGGG |      |
| Ni-HKT1;4 Ex1  | (896)  |      | CGTTCGTCGCCGTGCTGATGGCGCTGGTGTGCGGCATGGAGTGGGGCGGG |      |
| Ni-HKT1;4 gDNA | (1451) |      | CGTTCGTCGCCGTGCTGATGGCGCTGGTGTGCGGCATGGAGTGGGGCGGG |      |

|                |        |      |                                                     |      |
|----------------|--------|------|-----------------------------------------------------|------|
|                |        | 1501 |                                                     | 1550 |
| FL478          | (92)   |      | GCGCTGCAGGGGATGAGCCCGTGGGAGAAGGTGGTGAACGCGCTGTTCCCT |      |
| IR29           | (92)   |      | GCGCTGCAGGGGATGAGCCCGTGGGAGAAGGTGGTGAACGCGCTGTTCCCT |      |
| Ka             | (92)   |      | GCGCTGCAGGGGATGAGCCCGTGGGAGAAGGTGGTGAACGCGCTGTTCCCT |      |
| KV             | (92)   |      | GCGCTGCAGGGGATGAGCCCGTGGGAGAAGGTGGTGAACGCGCTGTTCCCT |      |
| NB             | (92)   |      | GCGCTGCAGGGGATGAGCCCGTGGGAGAAGGTGGTGAACGCGCTGTTCCCT |      |
| Ni             | (92)   |      | GCGCTGCAGGGGATGAGCCCGTGGGAGAAGGTGGTGAACGCGCTGTTCCCT |      |
| NSI            | (94)   |      | GCGCTGCAGGGGATGAGCCCGTGGGAGAAGGTGGTGAACGCGCTGTTCCCT |      |
| Po             | (94)   |      | GCGCTGCAGGGGATGAGCCCGTGGGAGAAGGTGGTGAACGCGCTGTTCCCT |      |
| SAL            | (94)   |      | GCGCTGCAGGGGATGAGCCCGTGGGAGAAGGTGGTGAACGCGCTGTTCCCT |      |
| Ni-HKT1;4 Ex1  | (946)  |      | GCGCTGCAGGGGATGAGCCCGTGGGAGAAGGTGGTGAACGCGCTGTTCCCT |      |
| Ni-HKT1;4 gDNA | (1501) |      | GCGCTGCAGGGGATGAGCCCGTGGGAGAAGGTGGTGAACGCGCTGTTCCCT |      |

|                |        |      |                                    |                  |
|----------------|--------|------|------------------------------------|------------------|
|                |        | 1551 |                                    | 1600             |
| FL478          | (142)  |      | CGCCGTGAACGCCCGGCACACCGGCGAGTCCACC | GTCGACCTCTCCATCC |
| IR29           | (142)  |      | CGCCGTGAACGCCCGGCACACCGGCGAGTCCACC | GTCGACCTCTCCATCC |
| Ka             | (142)  |      | CGCCGTGAACGCCCGGCACACCGGCGAGTCCACC | GTCGACCTCTCCATCC |
| KV             | (142)  |      | CGCCGTGAACGCCCGGCACACCGGCGAGTCCACC | GTCGACCTCTCCATCC |
| NB             | (142)  |      | CGCCGTGAACGCCCGGCACACCGGCGAGTCCACC | GTCGACCTCTCCATCC |
| Ni             | (142)  |      | CGCCGTGAACGCCCGGCACACCGGCGAGTCCACC | GTCGACCTCTCCATCC |
| NSI            | (144)  |      | CGCCGTGAACGCCCGGCACACCGGCGAGTCCACC | GTCGACCTCTCCATCC |
| Po             | (144)  |      | CGCCGTGAACGCCCGGCACACCGGCGAGTCCACC | GTCGACCTCTCCATCC |
| SAL            | (144)  |      | CGCCGTGAACGCCCGGCACACCGGCGAGTCCACC | GTCGACCTCTCCATCC |
| Ni-HKT1;4 Ex1  | (996)  |      | CGCCGTGAACGCCCGGCACACCGGCGAGTCCACC | GTCGACCTCTCCATCC |
| Ni-HKT1;4 gDNA | (1551) |      | CGCCGTGAACGCCCGGCACACCGGCGAGTCCACC | GTCGACCTCTCCATCC |

|                |        |      |                                      |              |
|----------------|--------|------|--------------------------------------|--------------|
|                |        | 1601 |                                      | 1650         |
| FL478          | (192)  |      | TCGCGCCGGCCATCCTCGTGCTCTTCGTCTCATGAT | GTGAGTGTCTCT |
| IR29           | (192)  |      | TCGCGCCGGCCATCCTCGTGCTCTTCGTCTCATGAT | GTGAGTGTCTCT |
| Ka             | (192)  |      | TCGCGCCGGCCATCCTCGTGCTCTTCGTCTCATGAT | GTGAGTGTCTCT |
| KV             | (192)  |      | TCGCGCCGGCCATCCTCGTGCTCTTCGTCTCATGAT | GTGAGTGTCTCT |
| NB             | (192)  |      | TCGCGCCGGCCATCCTCGTGCTCTTCGTCTCATGAT | GTGAGTGTCTCT |
| Ni             | (192)  |      | TCGCGCCGGCCATCCTCGTGCTCTTCGTCTCATGAT | GTGAGTGTCTCT |
| NSI            | (194)  |      | TCGCGCCGGCCATCCTCGTGCTCTTCGTCTCATGAT | GTGAGTGTCTCT |
| Po             | (194)  |      | TCGCGCCGGCCATCCTCGTGCTCTTCGTCTCATGAT | GTGAGTGTCTCT |
| SAL            | (194)  |      | TCGCGCCGGCCATCCTCGTGCTCTTCGTCTCATGAT | GTGAGTGTCTCT |
| Ni-HKT1;4 Ex1  | (1046) |      | TCGCGCCGGCCATCCTCGTGCTCTTCGTCTCATGAT | -----        |
| Ni-HKT1;4 gDNA | (1601) |      | TCGCGCCGGCCATCCTCGTGCTCTTCGTCTCATGAT | GTGAGTGTCTCT |

|                |        |                              |                      |       |
|----------------|--------|------------------------------|----------------------|-------|
|                |        | 1651                         |                      | 1700  |
| FL478          | (242)  | GTTTCTCTCTGACCTAAGCTCTCTCAGG |                      | ----- |
| IR29           | (242)  | GTTTCTCTCTGACCTAAGCTCTCTCAGG |                      | ----- |
| Ka             | (242)  | GTTTCTCTCTGACCTAAGCTCTCTCAGG |                      | ----- |
| KV             | (242)  | GTTTCTCTCTGACCTAAGCTCTCTCAGG |                      | ----- |
| NB             | (242)  | GTTTCTCTCTGACCTAAGCTCTCTCAGG |                      | ----- |
| Ni             | (242)  | GTTTCTCTCTGACCTAAGCTCTCTCAGG |                      | ----- |
| NSI            | (244)  | GTTTCTCTCTGACCTAAGCTCTCTCAGG |                      | ----- |
| Po             | (244)  | GTTTCTCTCTGACCTAAGCTCTCTCAGG |                      | ----- |
| SAL            | (244)  | GTTTCTCTCTGACCTAAGCTCTCTCAGG |                      | ----- |
| Ni-HKT1;4 Ex1  | (1084) | -----                        |                      | ----- |
| Ni-HKT1;4 gDNA | (1651) | GTTTCTCTCTGACCTAAGCTCTCTCAGG | GTCTCAGCTCTTCAACCTAG |       |

|                |        |                                   |                  |      |
|----------------|--------|-----------------------------------|------------------|------|
|                |        | 4301                              |                  | 4350 |
| FL478          | (1)    | -----                             | STATCTACCTCCGTAC |      |
| IR29           | (1)    | -----                             | STATCTACCTCCGTAC |      |
| Ka             | (1)    | -----                             | STATCTACCTCCGTAC |      |
| KV             | (1)    | -----                             | STATCTACCTCCGTAC |      |
| NB             | (1)    | -----                             | STATCTACCTCCGTAC |      |
| Ni             | (1)    | -----                             | STATCTACCTCCGTAC |      |
| NSI            | (1)    | -----                             | STATCTACCTCCGTAC |      |
| Po             | (1)    | -----                             | STATCTACCTCCGTAC |      |
| SAL            | (1)    | -----                             | STATCTACCTCCGTAC |      |
| Ni-HKT1;4 Ex2  | (1)    | -----                             | STATCTACCTCCGTAC |      |
| Ni-HKT1;4 gDNA | (4301) | TGTTGTCATATTTCTGCTTCATCTGCGCTCCAG | STATCTACCTCCGTAC |      |

|                |        |                                                  |  |      |
|----------------|--------|--------------------------------------------------|--|------|
|                |        | 4351                                             |  | 4400 |
| FL478          | (6)    | ACGACGTGGTTCCCATTTGAAGAGAATTCCTACTAAGGATAGTAATGC |  |      |
| IR29           | (6)    | ACGACGTGGTTCCCATTTGAAGAGAATTCCTACTAAGGATAGTAATGC |  |      |
| Ka             | (6)    | ACGACGTGGTTCCCATTTGAAGAGAATTCCTACTAAGGATAGTAATGC |  |      |
| KV             | (6)    | ACGACGTGGTTCCCATTTGAAGAGAATTCCTACTAAGGATAGTAATGC |  |      |
| NB             | (6)    | ACGACGTGGTTCCCATTTGAAGAGAATTCCTACTAAGGATAGTAATGC |  |      |
| Ni             | (6)    | ACGACGTGGTTCCCATTTGAAGAGAATTCCTACTAAGGATAGTAATGC |  |      |
| NSI            | (6)    | ACGACGTGGTTCCCATTTGAAGAGAATTCCTACTAAGGATAGTAATGC |  |      |
| Po             | (6)    | ACGACGTGGTTCCCATTTGAAGAGAATTCCTACTAAGGATAGTAATGC |  |      |
| SAL            | (6)    | ACGACGTGGTTCCCATTTGAAGAGAATTCCTACTAAGGATAGTAATGC |  |      |
| Ni-HKT1;4 Ex2  | (16)   | ACGACGTGGTTCCCATTTGAAGAGAATTCCTACTAAGGATAGTAATGC |  |      |
| Ni-HKT1;4 gDNA | (4351) | ACGACGTGGTTCCCATTTGAAGAGAATTCCTACTAAGGATAGTAATGC |  |      |

|                |        |                                                   |  |      |
|----------------|--------|---------------------------------------------------|--|------|
|                |        | 4401                                              |  | 4450 |
| FL478          | (56)   | AGAGAACCAGGGAATCAGACTGCTCGAGAGTACACTTTTGTCCAACTCT |  |      |
| IR29           | (56)   | AGAGAACCAGGGAATCAGACTGCTCGAGAGTACACTTTTGTCCAACTCT |  |      |
| Ka             | (56)   | AGAGAACCAGGGAATCAGACTGCTCGAGAGTACACTTTTGTCCAACTCT |  |      |
| KV             | (56)   | AGAGAACCAGGGAATCAGACTGCTCGAGAGTACACTTTTGTCCAACTCT |  |      |
| NB             | (56)   | AGAGAACCAGGGAATCAGACTGCTCGAGAGTACACTTTTGTCCAACTCT |  |      |
| Ni             | (56)   | AGAGAACCAGGGAATCAGACTGCTCGAGAGTACACTTTTGTCCAACTCT |  |      |
| NSI            | (56)   | AGAGAACCAGGGAATCAGACTGCTCGAGAGTACACTTTTGTCCAACTCT |  |      |
| Po             | (56)   | AGAGAACCAGGGAATCAGACTGCTCGAGAGTACACTTTTGTCCAACTCT |  |      |
| SAL            | (56)   | AGAGAACCAGGGAATCAGACTGCTCGAGAGTACACTTTTGTCCAACTCT |  |      |
| Ni-HKT1;4 Ex2  | (66)   | AGAGAACCAGGGAATCAGACTGCTCGAGAGTACACTTTTGTCCAACTCT |  |      |
| Ni-HKT1;4 gDNA | (4401) | AGAGAACCAGGGAATCAGACTGCTCGAGAGTACACTTTTGTCCAACTCT |  |      |

|                |        |                                                     |  |      |
|----------------|--------|-----------------------------------------------------|--|------|
|                |        | 4451                                                |  | 4500 |
| FL478          | (106)  | CCTACCTGACCATCTTTGTTCATTGCCATCTGCATCACCGAGAGAAGAAAG |  |      |
| IR29           | (106)  | CCTACCTGACCATCTTTGTTCATTGCCATCTGCATCACCGAGAGAAGAAAG |  |      |
| Ka             | (106)  | CCTACCTGACCATCTTTGTTCATTGCCATCTGCATCACCGAGAGAAGAAAG |  |      |
| KV             | (106)  | CCTACCTGACCATCTTTGTTCATTGCCATCTGCATCACCGAGAGAAGAAAG |  |      |
| NB             | (106)  | CCTACCTGACCATCTTTGTTCATTGCCATCTGCATCACCGAGAGAAGAAAG |  |      |
| Ni             | (106)  | CCTACCTGACCATCTTTGTTCATTGCCATCTGCATCACCGAGAGAAGAAAG |  |      |
| NSI            | (106)  | CCTACCTGACCATCTTTGTTCATTGCCATCTGCATCACCGAGAGAAGAAAG |  |      |
| Po             | (106)  | CCTACCTGACCATCTTTGTTCATTGCCATCTGCATCACCGAGAGAAGAAAG |  |      |
| SAL            | (106)  | CCTACCTGACCATCTTTGTTCATTGCCATCTGCATCACCGAGAGAAGAAAG |  |      |
| Ni-HKT1;4 Ex2  | (116)  | CCTACCTGACCATCTTTGTTCATTGCCATCTGCATCACCGAGAGAAGAAAG |  |      |
| Ni-HKT1;4 gDNA | (4451) | CCTACCTGACCATCTTTGTTCATTGCCATCTGCATCACCGAGAGAAGAAAG |  |      |

|                |        |                                                    |  |      |
|----------------|--------|----------------------------------------------------|--|------|
|                |        | 4501                                               |  | 4550 |
| FL478          | (156)  | CTCAAAGAAGACCCCTCAACTTCAGTGTGCTAAGCATTGTTGTGCGAAGT |  |      |
| IR29           | (156)  | CTCAAAGAAGACCCCTCAACTTCAGTGTGCTAAGCATTGTTGTGCGAAGT |  |      |
| Ka             | (156)  | CTCAAAGAAGACCCCTCAACTTCAGTGTGCTAAGCATTGTTGTGCGAAGT |  |      |
| KV             | (156)  | CTCAAAGAAGACCCCTCAACTTCAGTGTGCTAAGCATTGTTGTGCGAAGT |  |      |
| NB             | (156)  | CTCAAAGAAGACCCCTCAACTTCAGTGTGCTAAGCATTGTTGTGCGAAGT |  |      |
| Ni             | (156)  | CTCAAAGAAGACCCCTCAACTTCAGTGTGCTAAGCATTGTTGTGCGAAGT |  |      |
| NSI            | (156)  | CTCAAAGAAGACCCCTCAACTTCAGTGTGCTAAGCATTGTTGTGCGAAGT |  |      |
| Po             | (156)  | CTCAAAGAAGACCCCTCAACTTCAGTGTGCTAAGCATTGTTGTGCGAAGT |  |      |
| SAL            | (156)  | CTCAAAGAAGACCCCTCAACTTCAGTGTGCTAAGCATTGTTGTGCGAAGT |  |      |
| Ni-HKT1;4 Ex2  | (166)  | CTCAAAGAAGACCCCTCAACTTCAGTGTGCTAAGCATTGTTGTGCGAAGT |  |      |
| Ni-HKT1;4 gDNA | (4501) | CTCAAAGAAGACCCCTCAACTTCAGTGTGCTAAGCATTGTTGTGCGAAGT |  |      |

|                |        |        |                                              |      |
|----------------|--------|--------|----------------------------------------------|------|
|                |        | 4551   |                                              | 4600 |
| FL478          | (206)  | TGTCAG | GCAAGTCAGACTAAATGGTTTCTTATCTGAGAAAAAAAATGCAG |      |
| IR29           | (206)  | TGTCAG | GCAAGTCAGACTAAATGGTTTCTTATCTGAGAAAAAAAATGCAG |      |
| Ka             | (206)  | TGTCAG | GCAAGTCAGACTAAATGGTTTCTTATCTGAGAAAAAAAATGCAG |      |
| KV             | (206)  | TGTCAG | GCAAGTCAGACTAAATGGTTTCTTATCTGAGAAAAAAAATGCAG |      |
| NB             | (206)  | TGTCAG | GCAAGTCAGACTAAATGGTTTCTTATCTGAGAAAAAAAATGCAG |      |
| Ni             | (206)  | TGTCAG | GCAAGTCAGACTAAATGGTTTCTTATCTGAGAAAAAAAATGCAG |      |
| NSI            | (206)  | TGTCAG | GCAAGTCAGACTAAATGGTTTCTTATCTGAGAAAAAAAATGCAG |      |
| Po             | (206)  | TGTCAG | GCAAGTCAGACTAAATGGTTTCTTATCTGAGAAAAAAAATGCAG |      |
| SAL            | (206)  | TGTCAG | GCAAGTCAGACTAAATGGTTTCTTATCTGAGAAAAAAAATGCAG |      |
| Ni-HKT1;4 Ex2  | (216)  | TGTCAG | -----CCTGAGAAAAAAAATGCAG                     |      |
| Ni-HKT1;4 gDNA | (4551) | TGTCAG | GCAAGTCAGACTAAATGGTTTCTTATCTGAGAAAAAAAATGCAG |      |

|                |        |                                                    |  |      |
|----------------|--------|----------------------------------------------------|--|------|
|                |        | 4601                                               |  | 4650 |
| FL478          | (256)  | ACCAAGTAAATTAACAATTTATCTGATGAAAACAGCAAAACACAAAGTAA |  |      |
| IR29           | (256)  | ACCAAGTAAATTAACAATTTATCTGATGAAAACAGCAAAACACAAAGTAA |  |      |
| Ka             | (256)  | ACCAAGTAAATTAACAATTTATCTGATGAAAACAGCAAAACACAAAGTAA |  |      |
| KV             | (256)  | ACCAAGTAAATTAACAATTTATCTGATGAAAACAGCAAAACACAAAGTAA |  |      |
| NB             | (256)  | ACCAAGTAAATTAACAATTTATCTGATGAAAACAGCAAAACACAAAGTAA |  |      |
| Ni             | (256)  | ACCAAGTAAATTAACAATTTATCTGATGAAAACAGCAAAACACAAAGTAA |  |      |
| NSI            | (256)  | ACCAAGTAAATTAACAATTTATCTGATGAAAACAGCAAAACACAAAGTAA |  |      |
| Po             | (256)  | ACCAAGTAAATTAACAATTTATCTGATGAAAACAGCAAAACACAAAGTAA |  |      |
| SAL            | (256)  | ACCAAGTAAATTAACAATTTATCTGATGAAAACAGCAAAACACAAAGTAA |  |      |
| Ni-HKT1;4 Ex2  | (222)  | -----                                              |  |      |
| Ni-HKT1;4 gDNA | (4601) | ACCAAGTAAATTAACAATTTATCTGATGAAAACAGCAAAACACAAAGTAA |  |      |

|                |        |                                                   |  |      |
|----------------|--------|---------------------------------------------------|--|------|
|                |        | 4651                                              |  | 4700 |
| FL478          | (306)  | CACTTGTCAGGTATTCTGAATCTTAATAATACACAATGAAAATAGTAAT |  |      |
| IR29           | (306)  | CACTTGTCAGGTATTCTGAATCTTAATAATACACAATGAAAATAGTAAT |  |      |
| Ka             | (306)  | CACTTGTCAGGTATTCTGAATCTTAATAATACACAATGAAAATAGTAAT |  |      |
| KV             | (306)  | CACTTGTCAGGTATTCTGAATCTTAATAATACACAATGAAAATAGTAAT |  |      |
| NB             | (306)  | CACTTGTCAGGTATTCTGAATCTTAATAATACACAATGAAAATAGTAAT |  |      |
| Ni             | (306)  | CACTTGTCAGGTATTCTGAATCTTAATAATACACAATGAAAATAGTAAT |  |      |
| NSI            | (306)  | CACTTGTCAGGTATTCTGAATCTTAATAATACACAATGAAAATAGTAAT |  |      |
| Po             | (306)  | CACTTGTCAGGTATTCTGAATCTTAATAATACACAATGAAAATAGTAAT |  |      |
| SAL            | (306)  | CACTTGTCAGGTATTCTGAATCTTAATAATACACAATGAAAATAGTAAT |  |      |
| Ni-HKT1;4 Ex2  | (222)  | -----                                             |  |      |
| Ni-HKT1;4 gDNA | (4651) | CACTTGTCAGGTATTCTGAATCTTAATAATACACAATGAAAATAGTAAT |  |      |

|                |        |                                                   |  |      |
|----------------|--------|---------------------------------------------------|--|------|
|                |        | 4701                                              |  | 4750 |
| FL478          | (356)  | GTTTCTTTTCGTGGAATCTGACGGATCTGCCACATTTGCAGTGCATATG |  |      |
| IR29           | (356)  | GTTTCTTTTCGTGGAATCTGACGGATCTGCCACATTTGCAGTGCATATG |  |      |
| Ka             | (356)  | GTTTCTTTTCGTGGAATCTGACGGATCTGCCACATTTGCAGTGCATATG |  |      |
| KV             | (356)  | GTTTCTTTTCGTGGAATCTGACGGATCTGCCACATTTGCAGTGCATATG |  |      |
| NB             | (356)  | GTTTCTTTTCGTGGAATCTGACGGATCTGCCACATTTGCAGTGCATATG |  |      |
| Ni             | (356)  | GTTTCTTTTCGTGGAATCTGACGGATCTGCCACATTTGCAGTGCATATG |  |      |
| NSI            | (356)  | GTTTCTTTTCGTGGAATCTGACGGATCTGCCACATTTGCAGTGCATATG |  |      |
| Po             | (356)  | GTTTCTTTTCGTGGAATCTGACGGATCTGCCACATTTGCAGTGCATATG |  |      |
| SAL            | (356)  | GTTTCTTTTCGTGGAATCTGACGGATCTGCCACATTTGCAGTGCATATG |  |      |
| Ni-HKT1;4 Ex3  | (1)    | -----TGCATATG                                     |  |      |
| Ni-HKT1;4 gDNA | (4701) | GTTTCTTTTCGTGGAATCTGACGGATCTGCCACATTTGCAGTGCATATG |  |      |

|                |        |                                                    |      |
|----------------|--------|----------------------------------------------------|------|
|                |        | 4751                                               | 4800 |
| FL478          | (406)  | GAAATGTGGGGTTCTCAATGGGCTACAGTTGCAGTAGACAGATCAATCCA |      |
| IR29           | (406)  | GAAATGTGGGGTTCTCAATGGGCTACAGTTGCAGTAGACAGATCAATCCA |      |
| Ka             | (406)  | GAAATGTGGGGTTCTCAATGGGCTACAGTTGCAGTAGACAGATCAATCCA |      |
| KV             | (406)  | GAAATGTGGGGTTCTCAATGGGCTACAGTTGCAGTAGACAGATCAATCCA |      |
| NB             | (406)  | GAAATGTGGGGTTCTCAATGGGCTACAGTTGCAGTAGACAGATCAATCCA |      |
| Ni             | (406)  | GAAATGTGGGGTTCTCAATGGGCTACAGTTGCAGTAGACAGATCAATCCA |      |
| NSI            | (406)  | GAAATGTGGGGTTCTCAATGGGCTACAGTTGCAGTAGACAGATCAATCCA |      |
| Po             | (406)  | GAAATGTGGGGTTCTCAATGGGCTACAGTTGCAGTAGACAGATCAATCCA |      |
| SAL            | (406)  | GAAATGTGGGGTTCTCAATGGGCTACAGTTGCAGTAGACAGATCAATCCA |      |
| Ni-HKT1;4 Ex3  | (9)    | GAAATGTGGGGTTCTCAATGGGCTACAGTTGCAGTAGACAGATCAATCCA |      |
| Ni-HKT1;4 gDNA | (4751) | GAAATGTGGGGTTCTCAATGGGCTACAGTTGCAGTAGACAGATCAATCCA |      |
|                |        |                                                    |      |
|                |        | 4801                                               | 4850 |
| FL478          | (456)  | GACCATCTCTGC-----                                  |      |
| IR29           | (456)  | GACCATCTCTGC-----                                  |      |
| Ka             | (456)  | GACCATCTCTGC-----                                  |      |
| KV             | (456)  | GACCATCTCTGC-----                                  |      |
| NB             | (456)  | GACCATCTCTGC-----                                  |      |
| Ni             | (456)  | GACCATCTCTGC-----                                  |      |
| NSI            | (456)  | GACCATCTCTGC-----                                  |      |
| Po             | (456)  | GACCATCTCTGC-----                                  |      |
| SAL            | (456)  | GACCATCTCTGC-----                                  |      |
| Ni-HKT1;4 Ex3  | (59)   | GACCATCTCTGCACAGATAAATGGACTGGTTTCGTAGGGAGATGGAGCGA |      |
| Ni-HKT1;4 gDNA | (4801) | GACCATCTCTGCACAGATAAATGGACTGGTTTCGTAGGGAGATGGAGCGA |      |

**Figure S4. Sequence comparison of *OsHKT1;4* genomic DNA fragments across several rice lines.**

Two regions of the *OsHKT1;4* gene were sequenced from genomic DNA in nine rice lines. The first region (~300 bp) covers the 3'-end of the first exon up until the 5'-end of the first intron and the second region (~500 bp) from the start of the second exon until the 5'-end of the third exon. The sequences obtained were aligned with the Ni-*OsHKT1;4* locus genomic sequence mined from public databases. No differences were observed in any of the lines analyzed besides a point mutation in the second intron of Nipponbare which may represent a *japonica* v. *indica* single nucleotide polymorphism. Sequence alignment was performed using Align X (Invitrogen). Homologous sequences are highlighted in yellow or blue. The conserved codon encoding a Val residue in position 344 of the *OsHKT1;4* protein is highlighted in green. The abbreviations Po = Pokkali; NB = Nona Bokra; Ni = Nipponbare; KV = Kallurundai Vellai; Ka = Kalurundai; NSI = NSICRC106; and SAL = SAL208 stand for individual varieties, whereas IR29 and FL478 are full names of rice varieties.
