# Supplementary material for: A Two-Staged Model of Na+ Exclusion in Rice Explained by 3D Modeling of HKT Transporters and Alternative Splicing
Source: PubMed Central journal article supplement (PMC3394774; doi:10.1371/journal.pone.0039865), 2012-07-11
Supplement: pone.0039865.s005.pdf [file pone.0039865.s005.pdf]

|            |        |                                                     |                              |
|------------|--------|-----------------------------------------------------|------------------------------|
|            |        | 1                                                   | 50                           |
| Genomic    | (1)    | ATGCCGGCGCGGCGGTGCTGGA                              | TGCTGGCGGGCAGCGTGGCGGCGTTCGT |
| HKT1;4-SV2 | (1)    | ATGCCGGCGCGGCGGTGCTGGA                              | TGCTGGCGGGCAGCGTGGCGGCGTTCGT |
| HKT1;4-SV1 | (1)    | ATGCCGGCGCGGCGGTGCTGGA                              | TGCTGGCGGGCAGCGTGGCGGCGTTCGT |
| HKT1;4     | (1)    | ATGCCGGCGCGGCGGTGCTGGA                              | TGCTGGCGGGCAGCGTGGCGGCGTTCGT |
|            |        | 51                                                  | 100                          |
| Genomic    | (51)   | CGCCGTGCTGATGGCGCTGGTGTGCGGCATGGAGTGGGGCGGGCGCTGC   |                              |
| HKT1;4-SV2 | (51)   | CGCCGTGCTGATGGCGCTGGTGTGCGGCATGGAGTGGGGCGGGCGCTGC   |                              |
| HKT1;4-SV1 | (51)   | CGCCGTGCTGATGGCGCTGGTGTGCGGCATGGAGTGGGGCGGGCGCTGC   |                              |
| HKT1;4     | (51)   | CGCCGTGCTGATGGCGCTGGTGTGCGGCATGGAGTGGGGCGGGCGCTGC   |                              |
|            |        | 101                                                 | 150                          |
| Genomic    | (101)  | AGGGGATGAGCCCGTGGGAGAAGGTGGTGAACGCGCTGTTCCTCGCCGTG  |                              |
| HKT1;4-SV2 | (101)  | AGGGGATGAGCCCGTGGGAGAAGGTGGTGAACGCGCTGTTCCTCGCCGTG  |                              |
| HKT1;4-SV1 | (101)  | AGGGGATGAGCCCGTGGGAGAAGGTGGTGAACGCGCTGTTCCTCGCCGTG  |                              |
| HKT1;4     | (101)  | AGGGGATGAGCCCGTGGGAGAAGGTGGTGAACGCGCTGTTCCTCGCCGTG  |                              |
|            |        | 151                                                 | 200                          |
| Genomic    | (151)  | AACGCCCGGCACACCGGCGAGTCCACC                         | GTCGACCTCTCCATCCTCGCGCC      |
| HKT1;4-SV2 | (151)  | AACGCCCGGCACACCGGCGAGTCCACC                         | GTCGACCTCTCCATCCTCGCGCC      |
| HKT1;4-SV1 | (151)  | AACGCCCGGCACACCGGCGAGTCCACC                         | GTCGACCTCTCCATCCTCGCGCC      |
| HKT1;4     | (151)  | AACGCCCGGCACACCGGCGAGTCCACC                         | GTCGACCTCTCCATCCTCGCGCC      |
|            |        | 201                                                 | 250                          |
| Genomic    | (201)  | GGCCATCCTCGTGCTCTTCGTCCCTCATGAT                     | GTGAGTGTCTCTCTGTTTCTC        |
| HKT1;4-SV2 | (201)  | GGCCATCCTCGTGCTCTTCGTCCCTCATGAT                     | -----                        |
| HKT1;4-SV1 | (201)  | GGCCATCCTCGTGCTCTTCGTCCCTCATGAT                     | -----                        |
| HKT1;4     | (201)  | GGCCATCCTCGTGCTCTTCGTCCCTCATGAT                     | -----                        |
|            |        | 2901                                                | 2950                         |
| Genomic    | (2901) | TCATATTCTGCTTCATCTTGCCTCCAG                         | GSTATCTACCTCCGTACACGACGT     |
| HKT1;4-SV2 | (231)  | -----                                               | GSTATCTACCTCCGTACACGACGT     |
| HKT1;4-SV1 | (231)  | -----                                               | GSTATCTACCTCCGTACACGACGT     |
| HKT1;4     | (231)  | -----                                               | GSTATCTACCTCCGTACACGACGT     |
|            |        | 2951                                                | 3000                         |
| Genomic    | (2951) | GGTTCACATTTGAAGAGAATTCCTACTAAGGATAGTAATGCAGAGAAC    |                              |
| HKT1;4-SV2 | (254)  | GGTTCACATTTGAAGAGAATTCCTACTAAGGATAGTAATGCAGAGAAC    |                              |
| HKT1;4-SV1 | (254)  | GGTTCACATTTGAAGAGAATTCCTACTAAGGATAGTAATGCAGAGAAC    |                              |
| HKT1;4     | (254)  | GGTTCACATTTGAAGAGAATTCCTACTAAGGATAGTAATGCAGAGAAC    |                              |
|            |        | 3001                                                | 3050                         |
| Genomic    | (3001) | CAGGGAATCAGACTGCTCGAGAGTACACTTTTGTCACAACTCTCCTACCT  |                              |
| HKT1;4-SV2 | (304)  | CAGGGAATCAGACTGCTCGAGAGTACACTTTTGTCACAACTCTCCTACCT  |                              |
| HKT1;4-SV1 | (304)  | CAGGGAATCAGACTGCTCGAGAGTACACTTTTGTCACAACTCTCCTACCT  |                              |
| HKT1;4     | (304)  | CAGGGAATCAGACTGCTCGAGAGTACACTTTTGTCACAACTCTCCTACCT  |                              |
|            |        | 3051                                                | 3100                         |
| Genomic    | (3051) | GACCATCTTTGTTCATTGCCATCTGCATCACCGAGAGAAGAAAGCTCAAAG |                              |
| HKT1;4-SV2 | (354)  | GACCATCTTTGTTCATTGCCATCTGCATCACCGAGAGAAGAAAGCTCAAAG |                              |
| HKT1;4-SV1 | (354)  | GACCATCTTTGTTCATTGCCATCTGCATCACCGAGAGAAGAAAGCTCAAAG |                              |
| HKT1;4     | (354)  | GACCATCTTTGTTCATTGCCATCTGCATCACCGAGAGAAGAAAGCTCAAAG |                              |
|            |        | 3101                                                | 3150                         |
| Genomic    | (3101) | AAGACCCCTCAACTTCAGTGTGCTAAGCATTGTTGTGCGAAGTTGTCAGC  |                              |
| HKT1;4-SV2 | (404)  | AAGACCCCTCAACTTCAGTGTGCTAAGCATTGTTGTGCGAAGTTGTCAGC  |                              |
| HKT1;4-SV1 | (404)  | AAGACCCCTCAACTTCAGTGTGCTAAGCATTGTTGTGCGAAGTTGTCAGC  |                              |
| HKT1;4     | (404)  | AAGACCCCTCAACTTCAGTGTGCTAAGCATTGTTGTGCGAAGTTGTCAGC  |                              |
|            |        | 3151                                                | 3200                         |
| Genomic    | (3151) | CAAGTCAGACTAAATGGTTTCTTACCTGAGAAAAAAAATGCAGACCAAGT  |                              |
| HKT1;4-SV2 | (454)  | CAAGTCAGACTAAATGGTTTCTTACCTGAGAAAAAAAATGCAGACCAAGT  |                              |
| HKT1;4-SV1 | (454)  | CAAGTCAGACTAAATGGTTTCTTACCTGAGAAAAAAAATGCAGACCAAGT  |                              |
| HKT1;4     | (453)  | -----                                               |                              |
|            |        | 3201                                                | 3250                         |
| Genomic    | (3201) | AAATTAACAATTTATCTGATGAAAACAGCAAAACACAAAGTAACACTTGT  |                              |
| HKT1;4-SV2 | (504)  | AAATTAACAATTTATCTGATGAAAACAGCAAAACACAAAGTAACACTTGT  |                              |
| HKT1;4-SV1 | (504)  | AAATTAACAATTTATCTGATGAAAACAGCAAAACACAAAGTAACACTTGT  |                              |
| HKT1;4     | (453)  | -----                                               |                              |

|            |        |                                                    |  |      |
|------------|--------|----------------------------------------------------|--|------|
|            |        | 3251                                               |  | 3300 |
| Genomic    | (3251) | CAGGTATTCTGAATCTTAATAATACACAATGAAAATAGTAATGTTTCT   |  |      |
| HKT1;4-SV2 | (554)  | CAGGTATTCTGAATCTTAATAATACACAATGAAAATAGTAATGTTTCT   |  |      |
| HKT1;4-SV1 | (554)  | CAG-----                                           |  |      |
| HKT1;4     | (453)  | -----                                              |  |      |
|            |        | 3301                                               |  | 3350 |
| Genomic    | (3301) | TTCGTGGAATCTGACGGATCTGCCACATTGCAGTGCATATGGAAATGT   |  |      |
| HKT1;4-SV2 | (604)  | TTCGTGGAATCTGACGGATCTGCCACATTGCAGTGCATATGGAAATGT   |  |      |
| HKT1;4-SV1 | (557)  | -----TGCATATGGAAATGT                               |  |      |
| HKT1;4     | (453)  | -----TGCATATGGAAATGT                               |  |      |
|            |        | 3351                                               |  | 3400 |
| Genomic    | (3351) | GGGGTTCTCAATGGGCTACAGTTGCAGTAGACAGATCAATCCAGACCATC |  |      |
| HKT1;4-SV2 | (654)  | GGGGTTCTCAATGGGCTACAGTTGCAGTAGACAGATCAATCCAGACCATC |  |      |
| HKT1;4-SV1 | (572)  | GGGGTTCTCAATGGGCTACAGTTGCAGTAGACAGATCAATCCAGACCATC |  |      |
| HKT1;4     | (468)  | GGGGTTCTCAATGGGCTACAGTTGCAGTAGACAGATCAATCCAGACCATC |  |      |
|            |        | 3401                                               |  |      |
| Genomic    | (3401) | <u>TCTGC</u>                                       |  |      |
| HKT1;4-SV2 | (704)  | <u>TCTGC</u>                                       |  |      |
| HKT1;4-SV1 | (622)  | <u>TCTGC</u>                                       |  |      |
| HKT1;4     | (518)  | <u>TCTGC</u>                                       |  |      |

**Figure S5. Sequences of *OsHKT1;4* splice variants.** A predicted 522 bp fragment spanning over the *OsHKT1;4* transcript three exons was amplified by RT-PCR from RNA purified from salt treated Nipponbare and Pokkali sheath tissue. Three amplification products were recovered from each line: the predicted 522 bp fragment (HKT1;4) and two other fragments of superior sizes (HKT1;4-SV1 and HKT1;4-SV2). No sequence variation was observed between the fragments of similar size across the two lines (data not shown). Here, an alignment of the three splice forms is presented against the genomic sequence of the *OsHKT1;4* gene (Genomic). The increased length of both splice variants is due to alternative splicing of the second intron. Whereas *SV1* is splicing a second shorter intron, only one intron, the first, is spliced in *SV2*. Both variants are translated into an identical truncated protein due to the presence of an in frame STOP codon in the 5'-end of *OsHKT1;4* second intron. Sequence alignment was performed using Align X (Invitrogen). Homologous sequences are highlighted in yellow or blue. The full length second intron is highlighted in blue. The conserved codon encoding a Val residue in position 344 of the *OsHKT1;4* protein is highlighted in green. The in frame STOP codon in the second intron is highlighted in purple. The RT-PCR primers are highlighted in grey. The sequences of the primers used to perform the HPLC molecular count ratio between the three splice forms are underlined in black.
