# Supplementary material for: A Two-Staged Model of Na+ Exclusion in Rice Explained by 3D Modeling of HKT Transporters and Alternative Splicing
Source: PubMed Central journal article supplement (PMC3394774; doi:10.1371/journal.pone.0039865), 2012-07-11
Supplement: pone.0039865.s006.pdf [file pone.0039865.s006.pdf]

|                     |       |  | 1                                      | 50                 |
|---------------------|-------|--|----------------------------------------|--------------------|
| Ni-HKT1;4           | (1)   |  | MPTSRRALAGGALSMHVAYFLAISCLGYGLLGVLVKVP | EPGAAPRRIDRFF      |
| Po-HKT1;4           | (1)   |  | MPTSRRALAGGALSMHVAYFLAISCLGYGLLGVLVKVP | EPGAAPRRIDRFF      |
| Ni-HKT1;4 truncated | (1)   |  | MPTSRRALAGGALSMHVAYFLAISCLGYGLLGVLVKVP | EPGAAPRRIDRFF      |
|                     |       |  | 51                                     | 100                |
| Ni-HKT1;4           | (51)  |  | TAVSAATVSSMSTVEMEVFSNGQLVVLTVLMLLGG    | EVFVSLVGLASKWSK    |
| Po-HKT1;4           | (51)  |  | TAVSAATVSSMSTVEMEVFSNGQLVVLTVLMLLGG    | EVFVSLVGLASKWSK    |
| Ni-HKT1;4 truncated | (51)  |  | TAVSAATVSSMSTVEMEVFSNGQLVVLTVLMLLGG    | EVFVSLVGLASKWSK    |
|                     |       |  | 101                                    | 150                |
| Ni-HKT1;4           | (101) |  | LRSDAMDRSRVESHGDVALADIDGGDVENPTSSGEE   | AASRRRPMADATL      |
| Po-HKT1;4           | (101) |  | LRSDAMDRSQRVESHGDVALADIDGGDVENPTSSGEE  | AASRRRPMADATL      |
| Ni-HKT1;4 truncated | (101) |  | LRSDAMDRSRVESHGDVALADIDGGDVENPTSSGEE   | AASRRRPMADATL      |
|                     |       |  | 151                                    | 200                |
| Ni-HKT1;4           | (151) |  | RHNAVRALFYIVLAIFAVVHVVGAVAVAAAYVLAS    | PGARRTLGDKSLNTWT   |
| Po-HKT1;4           | (151) |  | RHNAVRALFYIVLAIFAVVHVVGAVAVAAAYVLAS    | PGARRTLGDKSLNTWT   |
| Ni-HKT1;4 truncated | (151) |  | RHNAVRALFYIVLAIFAVVHVVGAVAVAAAYVLAS    | PGARRTLGDKSLNTWT   |
|                     |       |  | 201                                    | 250                |
| Ni-HKT1;4           | (201) |  | FAVFTTVSTFVSNCGFMPTNENMVVFKRDAPLQ      | LLLVPQVLAGNTLFAPLL |
| Po-HKT1;4           | (201) |  | FAVFTTVSTFVSNCGFMPTNENMVVFKRDAPLQ      | LLLVPQVLAGNTLFAPLL |
| Ni-HKT1;4 truncated | (201) |  | FAVFTTVSTFVSNCGFMPTNENMVVFKRDAPLQ      | LLLVPQVLAGNTLFAPLL |
|                     |       |  | 251                                    | 300                |
| Ni-HKT1;4           | (251) |  | AACVWAAAAATRREELVEMAREGGRAAAAGYAH      | LMPARRCWMLAATVAAF  |
| Po-HKT1;4           | (251) |  | AACVWAAAAATRREELVEMAREGGRAAAAGYAH      | LMPARRCWMLAATVAAF  |
| Ni-HKT1;4 truncated | (251) |  | AACVWAAAAATRREELVEMAREGGRAAAAGYAH      | LMPARRCWMLAATVAAF  |
|                     |       |  | 301                                    | 350                |
| Ni-HKT1;4           | (301) |  | VAVLMALVCGMEWGGALQGMSPWEKVVNALFLAV     | NARHTGESTV DLSILA  |
| Po-HKT1;4           | (301) |  | VAVLMALVCGMEWGGALQGMSPWEKVVNALFLAV     | NARHTGESTV DLSILA  |
| Ni-HKT1;4 truncated | (301) |  | VAVLMALVCGMEWGGALQGMSPWEKVVNALFLAV     | NARHTGESTV DLSILA  |
|                     |       |  | 351                                    | 400                |
| Ni-HKT1;4           | (351) |  | PAILVLFVLMYLPPTYTWFPEENSTTKDSNAEN      | QIRLLESTLTSQLS     |
| Po-HKT1;4           | (351) |  | PAILVLFVLMYLPPTYTWFPEENSTTKDSNAEN      | QIRLLESTLTSQLS     |
| Ni-HKT1;4 truncated | (351) |  | PAILVLFVLMYLPPTYTWFPEENSTTKDSNAEN      | QIRLLESTLTSQLS     |
|                     |       |  | 401                                    | 450                |
| Ni-HKT1;4           | (401) |  | YLTIFVIAICITERRRLKEDPLNFSVLSIVVEV      | VSAYGNVGFSGYSCSR   |
| Po-HKT1;4           | (401) |  | YLTIFVIAICITERRRLKEDPLNFSVLSIVVEV      | VSAYGNVGFSGYSCSR   |
| Ni-HKT1;4 truncated | (401) |  | YLTIFVIAICITERRRLKEDPLNFSVLSIVVEV      | VSAYGNVGFSGYSCSR   |
|                     |       |  | 451                                    | 500                |
| Ni-HKT1;4           | (451) |  | QINPDHLCTDKWTGFVGRWSDSGKLILIFVMFF      | GRLKKFSMKGGKAWKLS  |
| Po-HKT1;4           | (451) |  | QINPDHLCTDKWTGFVGRWSDSGKLILIFVMFF      | GRLKKFSMKGGKAWKLS  |
| Ni-HKT1;4 truncated | (451) |  | QVN-----                               |                    |

**Figure S6. OsHKT1;4 protein sequence comparison.** The Pokkali (Po) *OsHKT1;4* transcript encoding a functional protein was fully sequenced and its nucleotide sequence translated into an amino acid sequence. Po-*OsHKT1;4* encodes for a 500 amino acid protein which share 99.8% homology with the *OsHKT1;4* protein from Nipponbare (Ni). The sole difference between the two functional *OsHKT1;4* proteins is a R to Q substitution in position 110 in Pokkali. The structural modeling of the *OsHKT1;4* protein predicts that this substitution is localized in the cytoplasm-exposed loop inter-connecting membrane  $\alpha$ -helices between the first two domains of the protein and thus does not affect  $\text{Na}^+$  transport rate. Ni-*OsHKT1;4* and Po-*OsHKT1;4* were aligned against a predicted truncated protein generated by the splice variants. This predicted splice variant protein is 47 amino acid residues shorter and differs from the full-length *OsHKT1;4* protein in its 19 C-terminal residues. The protein sequences were aligned using Align X (Invitrogen). Homologous regions are highlighted in yellow or blue. The conserved Val residue in position 344 is highlighted in green.
