# Supplementary material for: A Two-Staged Model of Na+ Exclusion in Rice Explained by 3D Modeling of HKT Transporters and Alternative Splicing
Source: PubMed Central journal article supplement (PMC3394774; doi:10.1371/journal.pone.0039865), 2012-07-11
Supplement: pone.0039865.s007.pdf [file pone.0039865.s007.pdf]

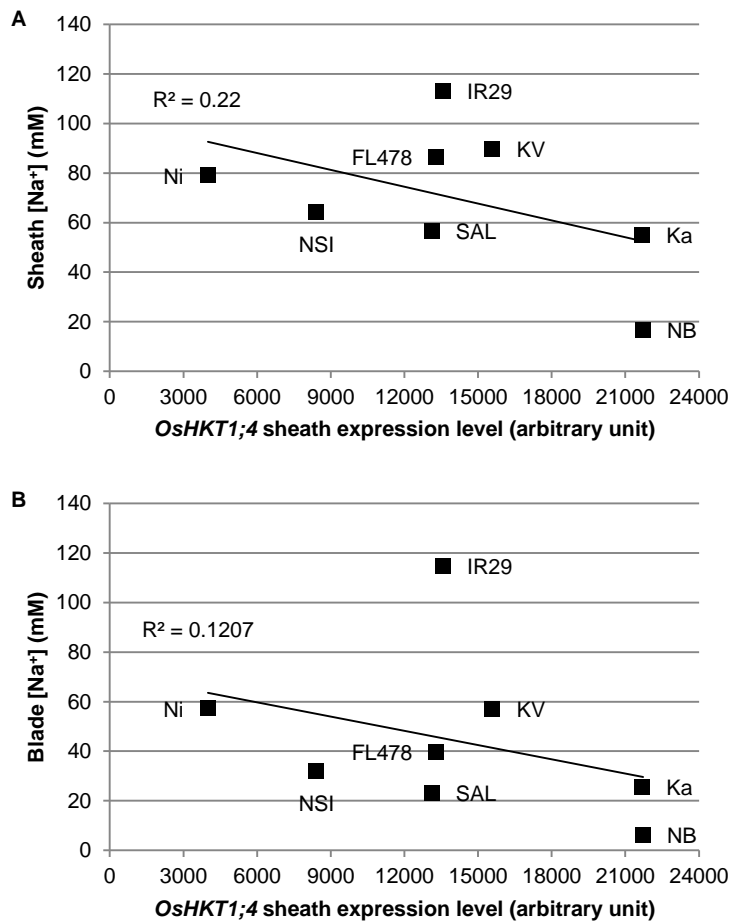

**Figure S7. Correlation between *OshKT1;4* sheath expression level and Na<sup>+</sup> tissue concentration.** (A) Correlation between sheath *OshKT1;4* expression level measured by qRT-PCR (3 biological reps per line; 3 technical reps per biological sample) and sheath Na<sup>+</sup> concentration measured by flame photometry (n = 5) in 8 rice lines salt treated as per described in the methods section. (B) Similar correlation with blade Na<sup>+</sup> concentration. No correlation were observed. The abbreviations NB = Nona Bokra; Ni = Nipponbare; KV = Kallurundai Vellai; Ka = Kalurundai; NSI = NSICRC106; and SAL = SAL208 stand for individual varieties, whereas IR29 and FL478 are full names of rice varieties.
